# Supplementary material for: Adipic acid directed self-healable supramolecular metallogels of Co(ii) and Ni(ii): intriguing scaffolds for comparative optical-phenomenon in terms of third-order optical non-linearity
Source: Royal Society of Chemistry journal article supplement (doi:10.1039/d2dt01983c), 2022-01-01
Supplement: d2dt01983c1.pdf [file d2dt01983c1.pdf]

# Electronic Supplementary Information

## Adipic Acid Directed Self-Healable Supramolecular Metallogels of Co(II) and Ni(II): Intriguing Scaffolds for Comparative Optical-Phenomenon in terms of Third Order Optical Non-Linearity

Gerald Lepcha<sup>a,d</sup>, Tara Singha<sup>b,d</sup>, Santanu Majumdar<sup>a</sup>, Amit Kumar Pradhan<sup>b</sup>, Krishna Sundar Das<sup>c</sup>, Prasanta Kumar Datta<sup>b,\*</sup>, Biswajit Dey<sup>a,\*</sup>

<sup>a</sup>Department of Chemistry, Visva-Bharati University, Santiniketan-731235, India.

<sup>b</sup>Department of Physics, Indian Institute of Technology Kharagpur, Kharagpur-721302, India.

<sup>c</sup>School of Chemical Sciences, Indian Association for the Cultivation of Science, Jadavpur, Kolkata, West Bengal-700032

### Corresponding Author

\*(B.D.) E-mail: bdeychem@gmail.com

\*(P.K.D.) E-mail: pkdatta@phy.iitkgp.ac.in

### Author Contributions

<sup>d</sup>Authors are equally contributed.

## 1. Experimental Section:

### 1.1. Table S1. Representating the influence of the counter-anion of metal salts on the gelation ability of Co-AA metallochel.<sup>a</sup>

| Entry | Metal Salt                                           | [Metal Salt] | [Adipic acid] | Vol. <sup>b</sup> | Phase <sup>c</sup> | Picture                                                                              |
|-------|------------------------------------------------------|--------------|---------------|-------------------|--------------------|--------------------------------------------------------------------------------------|
| 1     | Co(NO <sub>3</sub> ) <sub>2</sub> ·6H <sub>2</sub> O | 1 mM         | 2 mM          | 1 mL              | S                  | 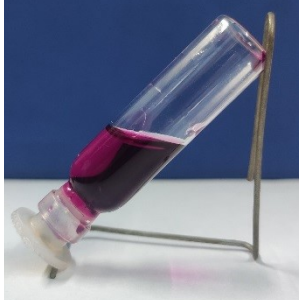  |
| 2     | CoCl <sub>2</sub> ·6H <sub>2</sub> O                 | 1 mM         | 2 mM          | 1 mL              | S                  |  |

<sup>a</sup>Gelation tests were performed as described in the Experimental Section. <sup>b</sup>Total volume of solvent. <sup>c</sup>Abbreviations: S = solution.

### 1.2. Table S2. Representating the influence of the counter-anion of metal salts on the gelation ability of Ni-AA metallochel.<sup>a</sup>

| Entry | Metal Salt                                           | [Metal Salt] | [Adipic acid] | Vol. <sup>b</sup> | Phase <sup>c</sup> | Picture                                                                               |
|-------|------------------------------------------------------|--------------|---------------|-------------------|--------------------|---------------------------------------------------------------------------------------|
| 1     | Ni(NO <sub>3</sub> ) <sub>2</sub> ·6H <sub>2</sub> O | 1 mM         | 2 mM          | 1 mL              | S                  | 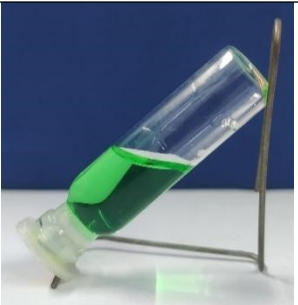 |
| 2     | NiCl <sub>2</sub> ·6H <sub>2</sub> O                 | 1 mM         | 2 mM          | 1 mL              | S                  |  |

<sup>a</sup>Gelation tests were performed as described in the Experimental Section. <sup>b</sup>Total volume of solvent. <sup>c</sup>Abbreviations: S = solution.

### 1.3. Testing of gelation ability of different solvents in forming stable metallogel of Co-AA and Ni-AA metallogels

#### Gelation ability of different solvents in forming stable metallogel of Co-AA:

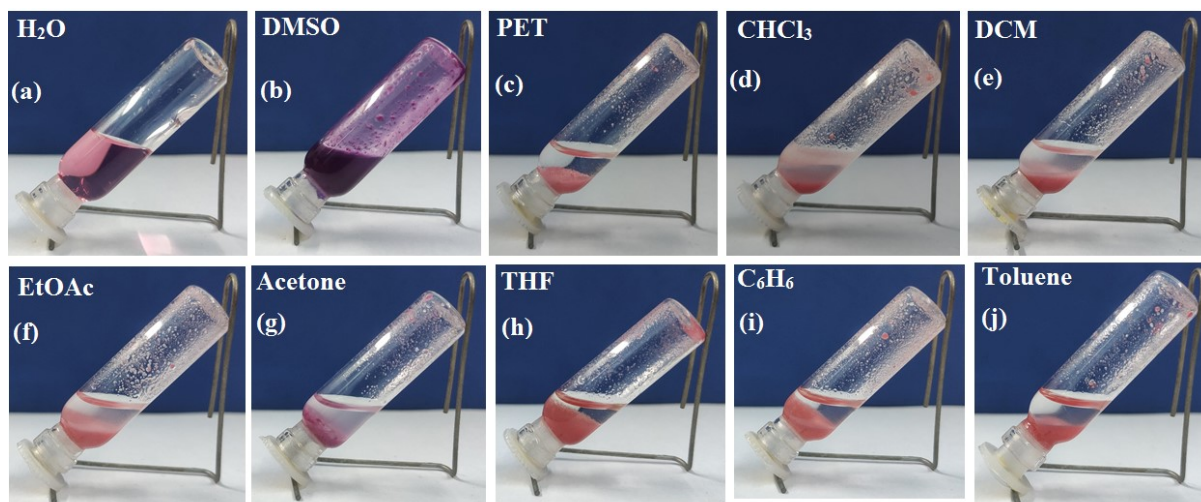

**Fig. S1.** Investigation of gelation ability of different solvents in forming stable metallogel of Co-AA. Here, the optimum amounts of gel-forming agents (like Co(II) acetate tetrahydrate, and adipic acid), mentioned in the synthetic part of experimental section, were maintained throughout the entire solvent dependent studies.

#### Gelation ability of different solvents in forming stable metallogel of Ni-AA:

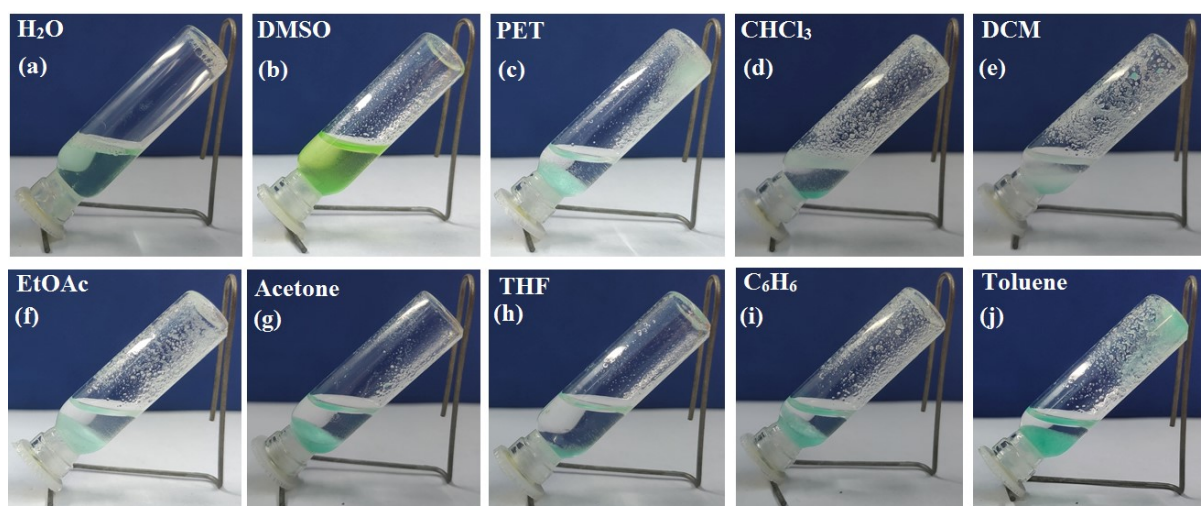

**Fig. S2.** Investigation of gelation ability of different solvents in forming stable metallogel of Ni-AA. The optimum amounts of gel-forming agents (like Ni(II) acetate tetrahydrate, and adipic acid), mentioned in the synthetic part of experimental section, were maintained throughout the entire solvent dependent studies.

## 2. Rheological Experiments:

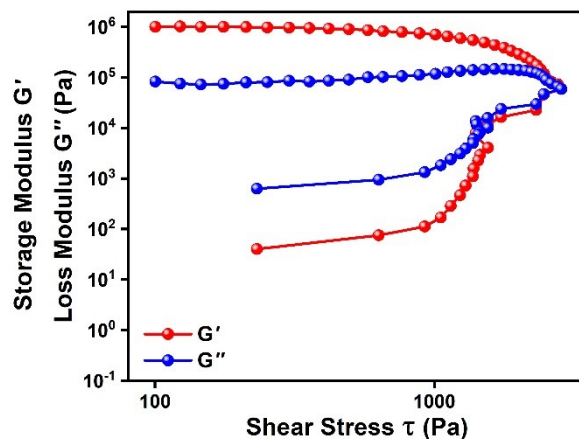

(a)

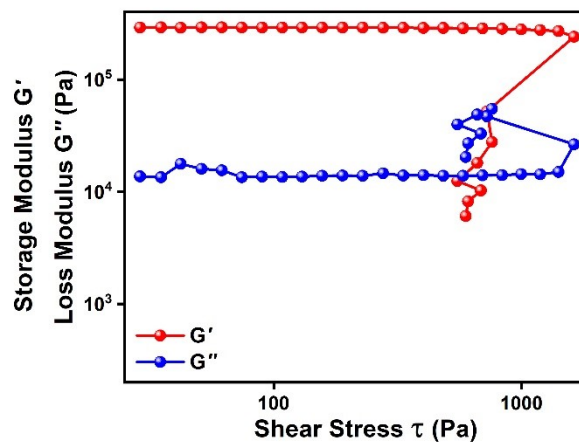

(b)

**Fig. S3** (a) Stress sweep test for Co-AA and (b) Stress sweep test for Ni-AA.

**3. Z-scan Technique:** In the Z-scan technique, we used 750 nm beam excitation at pulse width 100 fs and repetition rate of 1 kHz from a commercial optical parametric amplifier (TOPAS-Prime, OPA). The OPA is seeded with a Ti-sapphire (Coherent, Libra HE) regenerative amplifier laser pulse at 808 nm, 50 fs pulse width at a repetition rate of 1 kHz. A plano-convex lens of 20 cm focal length is used to focus the input laser beam. The laser stability is  $\sim 2\%$ . The beam waist at focus and the Rayleigh range around the focus is  $\sim 50 \mu\text{m}$  and 1.05 cm respectively. The gel sample was kept inside a quartz cuvette with the effective sample length 1 mm and the cuvette was placed on a translational stage (Newport, GST-150), connected with a motion controller (Newport, ESP-150) for the scanning around the focus from  $-Z$  to  $+Z$  axis. The simultaneous open aperture (OA) and close aperture (CA) Z-scan measurements are performed with the linearly polarized 750 nm beam excitation at the intensity of  $64 \text{ GW/cm}^2$  to  $140 \text{ GW/cm}^2$ . The transmitted beam after the sample is split by a cubic beam splitter ( $\text{BS}_2$ ) for the collection of simultaneous OA and CA data by photodetectors,  $\text{PD}_1$  and  $\text{PD}_2$  respectively. A small aperture of a diameter  $\sim 1 \text{ mm}$  is placed in

front of PD<sub>2</sub> for CA Z-scan measurement. Two lock-in-amplifiers were used for data acquisition for a better signal-to-noise ratio. The signal-to-noise ratio of the lock-in-amplifiers in our measurement is ~25-30 dB. The translational stage and the lock-in-amplifiers are automated with Labview 2012 environment for the data collection and averaging. (Schematic diagram is shown in the main manuscript Fig: 7(a)) The sensitivity of the entire setup is reported in our previous work.<sup>1</sup>

#### 4. EDX spectral analyses of Co-AA and Ni-AA metallogels.

##### 4.1. EDX spectral analysis of Co-AA metallogel:

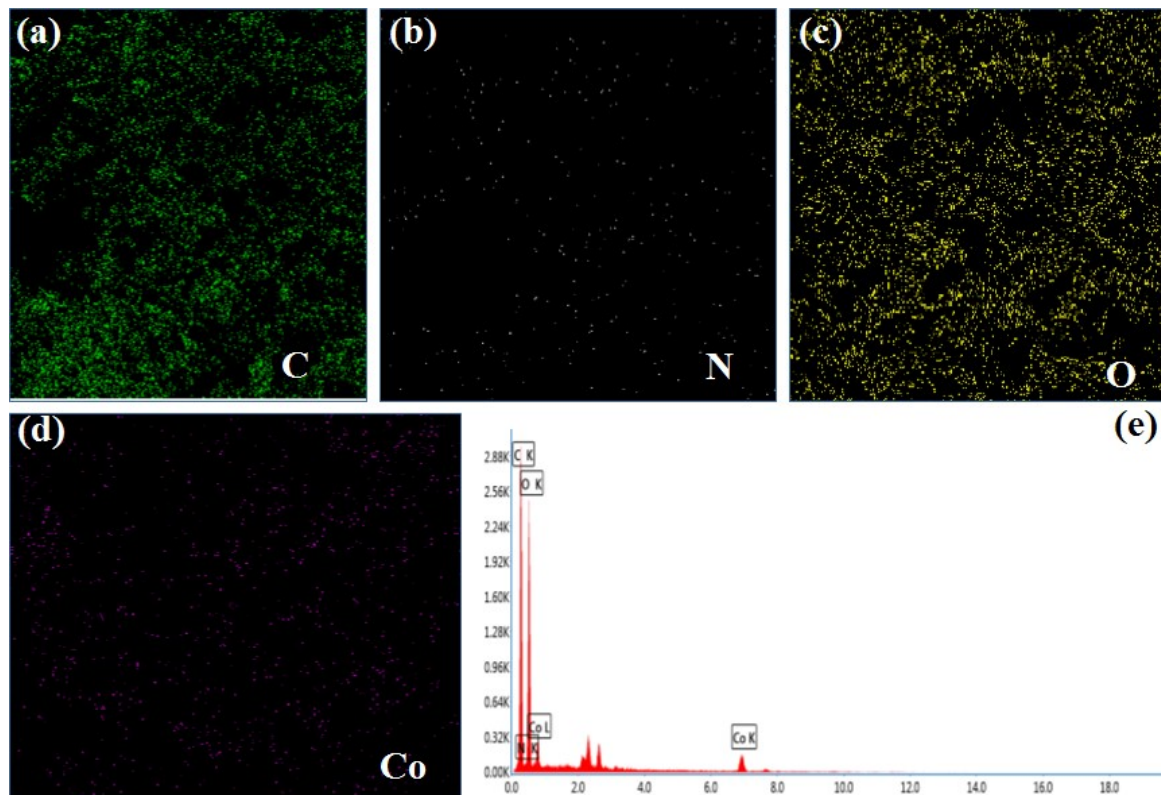

**Fig.S4.** (a-d) The elemental mapping of Co-AA showing the presence of C, N, O and Co elements as the constitutions of the stable metallogel, (e) EDX pattern of Co-AA metallogel.

## 4.2. EDX spectral analysis of Ni-AA metallo gel:

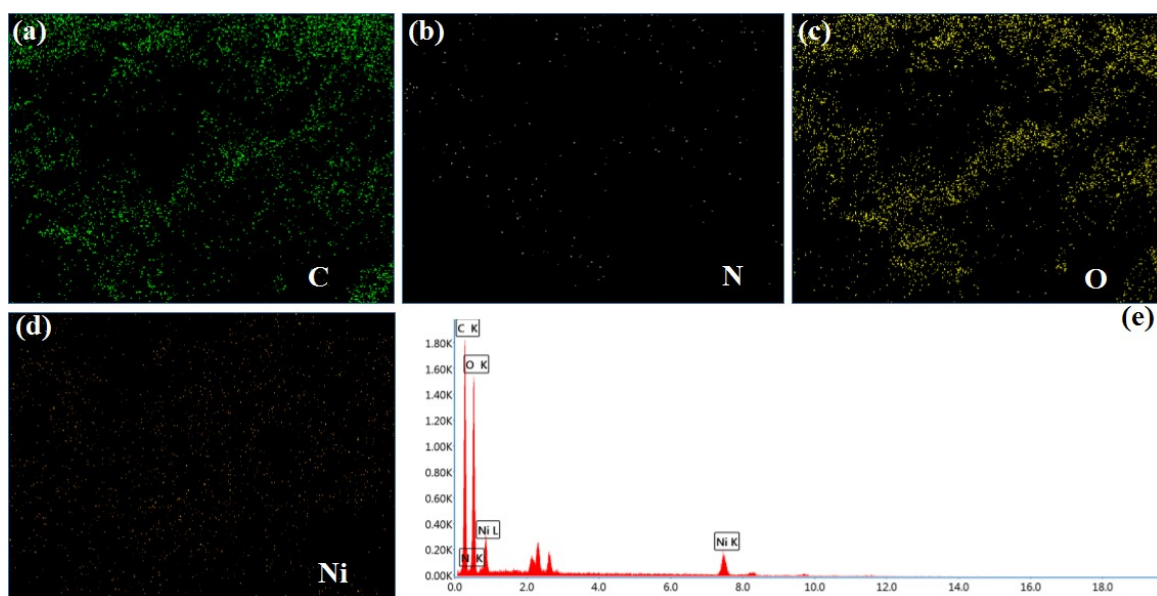

**Fig. S5.** (a-e) The elemental mapping of Ni-AA showing the presence of C, N, O and Ni elements as the constitutions of the stable metallo gel, (h) EDX pattern of Ni-AA metallo gel.

## 5. UV-Vis spectral analyses of Co-AA and Ni-AA metallo gels.

### 5.1. UV-Vis spectra of Co-AA metallo gel:

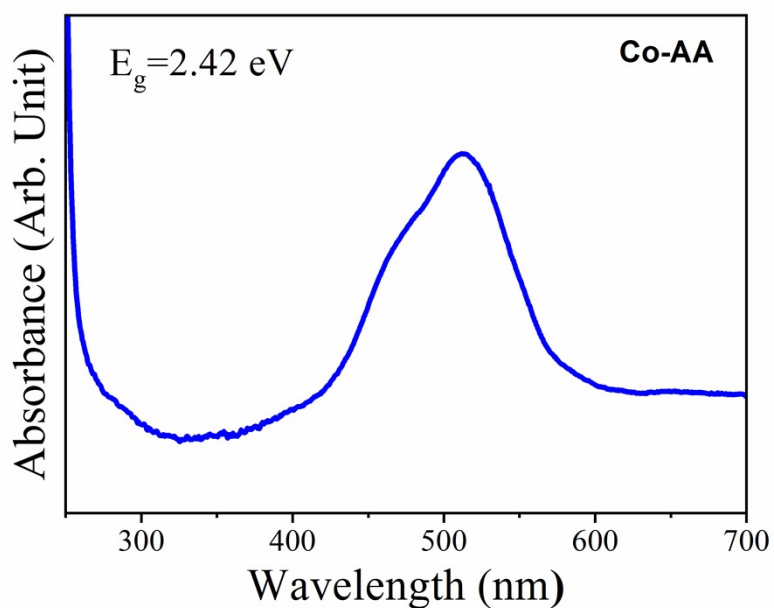

**Fig. S6.** UV-Vis spectra of Co-AA metallo gel.

## 5.2. UV-Vis spectra of Ni-AA metallogel:

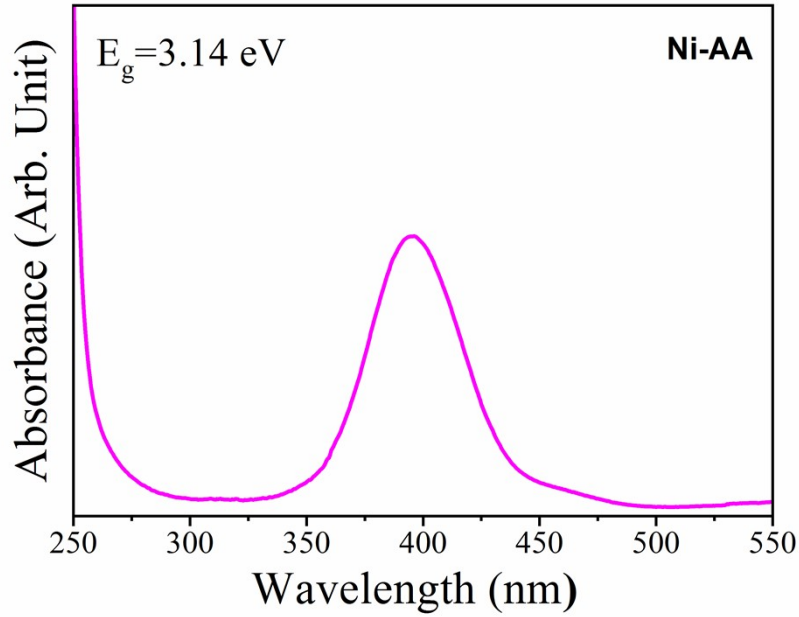

**Fig. S7.** UV-Vis spectra of Ni-AA metallogel.

## 6. Comparison table of Co-AA and Ni-AA with other materials in terms of NLO behaviour:

**Table S3.** Comparison of  $n_2^I$  values with other materials:

| Sample          | Incident Beam          | $n_2^I$ (cm <sup>2</sup> /GW) | References |
|-----------------|------------------------|-------------------------------|------------|
| BSA-CuA         | 550 nm, 100 fs, 1 kHz  | $14.4 \times 10^{-7}$         | [2]        |
| BSA-CuCl        |                        | $11.16 \times 10^{-7}$        |            |
| RGO             | 630 nm, 150 fs, 1 kHz  | $4.407 \times 10^{-7}$        | [4]        |
| ZnSe            |                        | $3.595 \times 10^{-7}$        |            |
| RGO-ZnSe        |                        | $4.875 \times 10^{-7}$        |            |
| CS <sub>2</sub> | 800 nm, 110 fs, 20 Hz  | $3.1 \times 10^{-6}$          | [5]        |
| CdS QDs         | 790 nm, 130 fs, 76 MHz | $1.0 \times 10^{-6}$          | [6]        |
| Co-AA           | 750 nm, 100 fs, 1 kHz  | $3.619 \times 10^{-6}$        | This Work  |
| Ni-AA           |                        | $3.472 \times 10^{-6}$        |            |

**Table S4. Comparison of  $\beta$  values with other materials:**

| Sample          | Incident Beam          | $\beta$ (cm/GW)        | References |
|-----------------|------------------------|------------------------|------------|
| BSA-CuA         | 550 nm, 100 fs, 1 kHz  | $6.62 \times 10^{-2}$  | [2]        |
| BSA-CuCl        |                        | $5.40 \times 10^{-2}$  |            |
| RGO             | 630 nm, 150 fs, 1 kHz  | $1.9 \times 10^{-2}$   | [4]        |
| ZnSe            |                        | $3.3 \times 10^{-2}$   |            |
| RGO-ZnSe        |                        | $1.85 \times 10^{-1}$  |            |
| CdS QDs         | 790 nm, 130 fs, 76 MHz | $3.9 \times 10^{-2}$   | [6]        |
| C <sub>60</sub> | 1064 nm, 55 fs         | $1.5 \times 10^{-1}$   | [3]        |
| Co-AA           | 750 nm, 100 fs, 1 kHz  | $1.503 \times 10^{-1}$ | This Work  |
| Ni-AA           |                        | $1.381 \times 10^{-1}$ |            |



## References:

- (1) T. Singha, M. Karmakar, P. Kumbhakar, C. S. Tiwary and P. K. Datta, *Appl. Phys. Lett.*, 2022, **120**, 021101.
- (2) S. Majumdar, T. Singha, S. Dhibar, A. Mandal, P. K. Datta and B. Dey, *ACS Applied Electronic Materials*, 2020, **2**, 3678-3685.
- (3) R. A. Ganeev, *J. Opt. A: Pure Appl. Opt.*, 2005, **7**, 717.
- (4) A. B. Rahaman, S. Bhattacharya, A. Sarkar, T. Singha, D. Banerjee and P. K. Datta, *Journal of Applied Physics*, 2019, **126**, 233101.
- (5) S. Couris, M. Renard, O. Faucher, B. Lavorel, R. Chaux, E. Koudoumas and X. Michaut, *Chemical Physics Letters*, 2003, **369**, 318-324.
- (6) H.-M. Gong, X.-H. Wang, Y.-M. Du and Q.-Q. Wang, *J. Chem. Phys.*, 2006, **125**, 024707.
